# Supplementary material
Source: publisher figshare collection journal article supplement (https://frontiersin.figshare.com/ndownloader/files/27541700)
Supplement: Supplementary file [file 27541700]

## *Supplementary Material*

**Supplementary Table 1**

| Variable          | Valor R | Valor P |
|-------------------|---------|---------|
| BMI               | -0.1346 | 0.3414  |
| Triglycerides     | -0.1121 | 0.4289  |
| VLDL –c           | -0.1136 | 0.4225  |
| HDL –c            | -0.0815 | 0.5657  |
| Total Cholesterol | 0.0736  | 0.6041  |
| Glucose           | -0.1387 | 0.3269  |
| Insulin           | -0.0493 | 0.7287  |
| Leptin            | -0.1369 | 0.3757  |
| HOMA - IR         | -0.0689 | 0.6272  |

**Supplementary Table 1.** Pearson's correlation coefficient between serum ANGPTL3 levels and study variables in healthy pregnant women during the first trimester of pregnancy.

Abbreviations: BMI, Body mass index; HDL-C, High-Density Lipoprotein Cholesterol; VLDL. \*P<0.05 (two-tailed significance). Log-transformed (log10) values were used.

**Supplementary Table 2.**

| Variable          | Valor R   | Valor P |
|-------------------|-----------|---------|
| BMI               | -0.0963   | 0.4969  |
| Triglycerides     | 0.0506    | 0.7216  |
| VLDL –c           | 0.0489    | 0.7306  |
| HDL –c            | -0.2783   | 0.0458  |
| Total Cholesterol | 0.1376    | 0.3305  |
| Glucose           | -0.2515   | 0.0721  |
| Insulin           | -0.0896   | 0.5275  |
| Leptin            | -0.1724   | 0.2631  |
| HOMA - IR         | -0.121103 | 0.3924  |

**Supplementary Table 2.** Pearson's correlation coefficient between serum ANGPTL3 levels and study variables in healthy pregnant women during the second trimester of pregnancy.

Abbreviations: BMI, Body mass index; HDL-C, High-Density Lipoprotein Cholesterol; VLDL. \*P<0.05 (two-tailed significance). Log-transformed (log10) values were used.

**Supplementary Table 3.**

| Variable          | Valor R   | Valor P |
|-------------------|-----------|---------|
| BMI               | -0.064674 | 0.6487  |
| Triglycerides     | 0.008855  | 0.9503  |
| VLDL –c           | 0.006543  | 0.9633  |
| HDL –c            | -0.122674 | 0.3863  |
| Total Cholesterol | -0.012587 | 0.9294  |
| Glucose           | -0.163847 | 0.2458  |
| Insulin           | -0.070698 | 0.6185  |
| Leptin            | -0.136854 | 0.3757  |
| HOMA - IR         | -0.092890 | 0.5125  |

**Supplementary Table 3.** Pearson's correlation coefficient between serum ANGPTL3 levels and study variables in healthy pregnant women during the third trimester of pregnancy.

Abbreviations: BMI, Body mass index; HDL-C, High-Density Lipoprotein Cholesterol; VLDL. \*P<0.05 (two-tailed significance). Log-transformed (log10) values were used.
